# Supplementary material
Source: publisher figshare collection journal article supplement (https://tandf.figshare.com/ndownloader/files/20024852)
Supplement: Supplementary file 1 [file 20024852]

| **Supplemental Table 1.0.** Differences of least squares means, t-tests and confidence limits for stripe rust severity at Lacombe 2012 and 2013, and Olds, AB, 2013†. | | | | | | | | | | | | |
| --- | --- | --- | --- | --- | --- | --- | --- | --- | --- | --- | --- | --- |
| Effect | Main-plot | Sub-plot | Main-plot | Sub-plot | Estimate | Standard Error | DF | t Value | Pr > |t| | Alpha | Lower | Upper |
| main*sub | non | AC Andrew | spray | AC Andrew | 0.1508 | 5.8920 | 9.92 | 0.03 | 0.9801 | 0.05 | -12.9921 | 13.2936 |
| main*sub | non | AC Crystal | spray | AC Crystal | 58.3746 | 5.8920 | 9.92 | 9.91 | <.0001 | 0.05 | 45.2318 | 71.5174 |
| main*sub | non | CDC Abound | spray | CDC Abound | 7.4662 | 5.8920 | 9.92 | 1.27 | 0.2340 | 0.05 | -5.6767 | 20.6090 |
| main*sub | non | CDC Imagine | spray | CDC Imagine | 4.9941 | 5.8920 | 9.92 | 0.85 | 0.4166 | 0.05 | -8.1487 | 18.1369 |
| main*sub | non | H98077001 | spray | H98077001 | 17.2338 | 5.8920 | 9.92 | 2.92 | 0.0153 | 0.05 | 4.0910 | 30.3766 |
| main*sub | non | Harvest | spray | Harvest | 7.4326 | 5.8920 | 9.92 | 1.26 | 0.2360 | 0.05 | -5.7103 | 20.5754 |
| main*sub | non | Lillian | spray | Lillian | 0.1508 | 5.8920 | 9.92 | 0.03 | 0.9801 | 0.05 | -12.9921 | 13.2936 |
| main*sub | non | Mahigan | spray | Mahigan | 4.3813 | 5.8920 | 9.92 | 0.74 | 0.4744 | 0.05 | -8.7616 | 17.5241 |
| main*sub | non | Seebe | spray | Seebe | 0.1508 | 5.8920 | 9.92 | 0.03 | 0.9801 | 0.05 | -12.9921 | 13.2936 |
| main*sub | non | Snowhite476 | spray | Snowhite476 | 38.7079 | 5.8920 | 9.92 | 6.57 | <.0001 | 0.05 | 25.5651 | 51.8508 |
| †Pre-planned comparisons of the main-plot means (treated vs untreated) for the same sub-plot (the same cultivars) were made by invoking the LSMEANS statement with the DIFF option (Littell et al. 2002). | | | | | | | | | | | | |

| **Supplemental Table 1.1.** Differences of least squares means, t-tests and confidence limits for leaf spot severity at Lacombe and Olds, AB, 2013†. | | | | | | | | | | | | |
| --- | --- | --- | --- | --- | --- | --- | --- | --- | --- | --- | --- | --- |
| Effect | Main- P Plot | Sub-plot | Main- plot | Sub-plot | Estimate | Standard  Error | DF | t Value | Pr > |t| | Alpha | Lower | Upper |
| main*sub | non | AC Andrew | spray | AC Andrew | 1.8333 | 0.7258 | 8.98 | 2.53 | 0.0325 | 0.05 | 0.1910 | 3.4757 |
| main*sub | non | AC Crystal | spray | AC Crystal | 1.6667 | 0.7258 | 8.98 | 2.30 | 0.0473 | 0.05 | 0.0243 | 3.3090 |
| main*sub | non | CDC Abound | spray | CDC Abound | 3.8333 | 0.7258 | 8.98 | 5.28 | 0.0005 | 0.05 | 2.1910 | 5.4757 |
| main*sub | non | CDC Imagine | spray | CDC Imagine | 2.8333 | 0.7258 | 8.98 | 3.90 | 0.0036 | 0.05 | 1.1910 | 4.4757 |
| main*sub | non | H98077001 | spray | H98077001 | 1.6667 | 0.7258 | 8.98 | 2.30 | 0.0473 | 0.05 | 0.0243 | 3.3090 |
| main*sub | non | Harvest | spray | Harvest | 4.3333 | 0.7258 | 8.98 | 5.97 | 0.0002 | 0.05 | 2.6910 | 5.9757 |
| main*sub | non | Lillian | spray | Lillian | 2.1667 | 0.7258 | 8.98 | 2.99 | 0.0154 | 0.05 | 0.5243 | 3.8090 |
| main*sub | non | Mahigan | spray | Mahigan | 1.6667 | 0.7258 | 8.98 | 2.30 | 0.0473 | 0.05 | 0.0243 | 3.3090 |
| main*sub | non | Seebe | spray | Seebe | 2.5000 | 0.7258 | 8.98 | 3.44 | 0.0074 | 0.05 | 0.8576 | 4.1424 |
| main*sub | non | Snowhite476 | spray | Snowhite476 | 2.3333 | 0.7258 | 8.98 | 3.22 | 0.0106 | 0.05 | 0.6910 | 3.9757 |
| †Pre-planned comparisons of the main-plot means (treated vs untreated) for the same sub-plot (the same cultivars) were made by invoking the LSMEANS statement with the DIFF option (Littell et al. 2002). | | | | | | | | | | | | |

| **Supplemental Table 1.2.** Differences of least squares means, t-tests and confidence limits for yield at Lacombe 2012 and 2013, and Olds, AB, 2013†. | | | | | | | | | | | | |
| --- | --- | --- | --- | --- | --- | --- | --- | --- | --- | --- | --- | --- |
| Effect | Main-plot | Sub-plot | Main-plot | Sub-plot | Estimate | Standard Error | DF | t Value | Pr > |t| | Alpha | Lower | Upper |
| main*sub | non | AC Andrew | spray | AC Andrew | -111.52 | 125.98 | 2.23 | -0.89 | 0.4610 | 0.05 | -603.62 | 380.58 |
| main*sub | non | AC Crystal | spray | AC Crystal | -583.90 | 125.98 | 2.23 | -4.63 | 0.0353 | 0.05 | -1076.00 | -91.80 |
| main*sub | non | CDC Abound | spray | CDC Abound | -390.49 | 125.98 | 2.23 | -3.10 | 0.0787 | 0.05 | -882.59 | 101.60 |
| main*sub | non | CDC Imagine | spray | CDC Imagine | -187.31 | 125.98 | 2.23 | -1.49 | 0.2631 | 0.05 | -679.41 | 304.79 |
| main*sub | non | H98077001 | spray | H98077001 | -275.63 | 125.98 | 2.23 | -2.19 | 0.1470 | 0.05 | -767.73 | 216.46 |
| main*sub | non | Harvest | spray | Harvest | -288.81 | 125.98 | 2.23 | -2.29 | 0.1358 | 0.05 | -780.91 | 203.28 |
| main*sub | non | Lillian | spray | Lillian | -136.22 | 125.98 | 2.23 | -1.08 | 0.3826 | 0.05 | -628.32 | 355.88 |
| main*sub | non | Mahigan | spray | Mahigan | -169.52 | 127.51 | 2.31 | -1.33 | 0.2999 | 0.05 | -653.94 | 314.90 |
| main*sub | non | Seebe | spray | Seebe | -94.44 | 125.98 | 2.23 | -0.75 | 0.5246 | 0.05 | -586.54 | 397.66 |
| main*sub | non | Snowhite476 | spray | Snowhite476 | -313.60 | 125.98 | 2.23 | -2.49 | 0.1177 | 0.05 | -805.70 | 178.49 |
| †Pre-planned comparisons of the main-plot means (treated vs untreated) for the same sub-plot (the same cultivars) were made by invoking the LSMEANS statement with the DIFF option (Littell et al. 2002). | | | | | | | | | | | | |

| **Supplemental Table 1.3.** Differences of least squares means, t-tests and confidence limits for thousand kernel weight at Lacombe 2012 and 2013, and Olds, AB, 2013†. | | | | | | | | | | | | | | | | |
| --- | --- | --- | --- | --- | --- | --- | --- | --- | --- | --- | --- | --- | --- | --- | --- | --- |
| Effect | Main-plot | Sub-plot | Main-plot | Sub-plot | | Estimate | | Standard Error | | DF | t Value | | Pr > |t| | Alpha | Lower | Upper |
| main*sub | non | AC Andrew | spray | AC Andrew | | -2.2138 | | 0.8357 | | 7.84 | -2.65 | | 0.0298 | 0.05 | -4.1478 | -0.2799 |
| main*sub | non | AC Crystal | spray | AC Crystal | -5.5996 | | 0.8357 | | 7.84 | | -6.70 | 0.0002 | | 0.05 | -7.5335 | -3.6656 |
| main*sub | non | CDC Abound | spray | CDC Abound | -5.0999 | | 0.8357 | | 7.84 | | -6.10 | 0.0003 | | 0.05 | -7.0339 | -3.1659 |
| main*sub | non | CDC Imagine | spray | CDC Imagine | -3.0162 | | 0.8357 | | 7.84 | | -3.61 | 0.0071 | | 0.05 | -4.9501 | -1.0822 |
| main*sub | non | H98077001 | spray | H98077001 | -2.8491 | | 0.8357 | | 7.84 | | -3.41 | 0.0095 | | 0.05 | -4.7831 | -0.9152 |
| main*sub | non | Harvest | spray | Harvest | -3.3391 | | 0.8357 | | 7.84 | | -4.00 | 0.0041 | | 0.05 | -5.2731 | -1.4051 |
| main*sub | non | Lillian | spray | Lillian | -1.6828 | | 0.8357 | | 7.84 | | -2.01 | 0.0796 | | 0.05 | -3.6168 | 0.2511 |
| main*sub | non | Mahigan | spray | Mahigan | -2.7950 | | 0.8552 | | 8.68 | | -3.27 | 0.0102 | | 0.05 | -4.7407 | -0.8493 |
| main*sub | non | Seebe | spray | Seebe | -1.7661 | | 0.8357 | | 7.84 | | -2.11 | 0.0682 | | 0.05 | -3.7000 | 0.1679 |
| main*sub | non | Snowhite476 | spray | Snowhite476 | -5.2141 | | 0.8357 | | 7.84 | | -6.24 | 0.0003 | | 0.05 | -7.1481 | -3.2802 |
| †Pre-planned comparisons of the main-plot means (treated vs untreated) for the same sub-plot (the same cultivars) were made by invoking the LSMEANS statement with the DIFF option (Littell et al. 2002). | | | | | | | | | | | | | | | | |

| **Supplemental Table 1.4.** Differences of least squares means, t-tests and confidence limits for test weight at Lacombe 2012 and 2013, and Olds, AB, 2013†**.** | | | | | | | | | | | | |
| --- | --- | --- | --- | --- | --- | --- | --- | --- | --- | --- | --- | --- |
| Effect | Main-plot | Sub-plot | Main-plot | Sub-plot | Estimate | Standard | DF | t Value | Pr > |t| | Alpha | Lower | Upper |
| Error |
| main*sub | non | AC Andrew | spray | AC Andrew | -0.6669 | 0.9554 | 11.3 | -0.70 | 0.4993 | 0.05 | -2.7633 | 1.4294 |
| main*sub | non | AC Crystal | spray | AC Crystal | -1.2718 | 0.9554 | 11.3 | -1.33 | 0.2094 | 0.05 | -3.3681 | 0.8245 |
| main*sub | non | CDC Abound | spray | CDC Abound | -1.9326 | 0.9554 | 11.3 | -2.02 | 0.0674 | 0.05 | -4.0290 | 0.1637 |
| main*sub | non | CDC Imagine | spray | CDC Imagine | 0.5644 | 0.9554 | 11.3 | 0.590 | 0.5664 | 0.05 | -1.5320 | 2.6607 |
| main*sub | non | H98077001 | spray | H98077001 | -2.4113 | 0.9554 | 11.3 | -2.52 | 0.0278 | 0.05 | -4.5077 | -0.3150 |
| main*sub | non | Harvest | spray | Harvest | 0.1284 | 0.9554 | 11.3 | 0.13 | 0.8955 | 0.05 | -1.9680 | 2.2247 |
| main*sub | non | Lillian | spray | Lillian | 0.5151 | 0.9554 | 11.3 | 0.54 | 0.6003 | 0.05 | -1.5812 | 2.6114 |
| main*sub | non | Mahigan | spray | Mahigan | -1.8190 | 0.9598 | 11.5 | -1.90 | 0.0834 | 0.05 | -3.9194 | 0.2814 |
| main*sub | non | Seebe | spray | Seebe | -0.4679 | 0.9554 | 11.3 | -0.49 | 0.6337 | 0.05 | -2.5642 | 1.6284 |
| main*sub | non | Snowhite476 | spray | Snowhite476 | -1.7957 | 0.9554 | 11.3 | -1.88 | 0.0862 | 0.05 | -3.8920 | 0.3006 |
| †Pre-planned comparisons of the main-plot means (treated vs untreated) for the same sub-plot (the same cultivars) were made by invoking the LSMEANS statement with the DIFF option (Littell et al. 2002). | | | | | | | | | | | | |

| **Supplemental Table 2.0.** Differences of least squares means, t-tests and confidence limits for stripe rust severity at Lacombe and Olds, AB, 2014†. | | | | | | | | | | | | |
| --- | --- | --- | --- | --- | --- | --- | --- | --- | --- | --- | --- | --- |
| Effect | Main-plot | Sub-plot | Main-plot | Sub-plot | Estimate | Standard | DF | t Value | Pr > |t| | Alpha | Lower | Upper |
| Error |
| main*sub | non | AC Andrew | spray | AC Andrew | 10.1667 | 12.1666 | 28.1 | 0.84 | 0.4104 | 0.05 | -14.7510 | 35.0842 |
| main*sub | non | AC Crystal | spray | AC Crystal | 53.3333 | 12.1666 | 28.1 | 4.38 | 0.0001 | 0.05 | 28.4158 | 78.2509 |
| main*sub | non | CDC Abound | spray | CDC Abound | 38.6667 | 12.1666 | 28.1 | 3.18 | 0.0036 | 0.05 | 13.7491 | 63.5842 |
| main*sub | non | CDC Imagine | spray | CDC Imagine | 13.3333 | 12.1666 | 28.1 | 1.10 | 0.2824 | 0.05 | -11.5840 | 38.2509 |
| main*sub | non | H98077001 | spray | H98077001 | 32.6667 | 12.1666 | 28.1 | 2.68 | 0.0120 | 0.05 | 7.7491 | 57.5842 |
| main*sub | non | Harvest | spray | Harvest | 30.8333 | 12.1666 | 28.1 | 2.53 | 0.0171 | 0.05 | 5.9158 | 55.7509 |
| main*sub | non | Lillian | spray | Lillian | -0.6667 | 12.1666 | 28.1 | -0.05 | 0.9567 | 0.05 | -25.5840 | 24.2509 |
| main*sub | non | Mahigan | spray | Mahigan | 22.6667 | 12.1666 | 28.1 | 1.86 | 0.0729 | 0.05 | -2.2509 | 47.5842 |
| main*sub | non | Seebe | spray | Seebe | 3.5000 | 12.1666 | 28.1 | 0.29 | 0.7757 | 0.05 | -21.4180 | 28.4176 |
| main*sub | non | Snowhite476 | spray | Snowhite476 | 25.8330 | 12.1666 | 28.1 | 2.12 | 0.0427 | 0.05 | 0.9158 | 50.7510 |
| †Pre-planned comparisons of the main-plot means (treated vs untreated) for the same sub-plot (the same cultivars) were made by invoking the LSMEANS statement with the DIFF option (Littell et al. 2002). | | | | | | | | | | | | |

| **Supplemental Table 2.1.** Differences of least squares means, t-tests and confidence limits for yield at Lacombe and Olds, AB, 2014†.   |  | | --- | |  | | | | | | | | | | | | | |
| --- | --- | --- | --- | --- | --- | --- | --- | --- | --- | --- | --- | --- | --- | --- |
| Effect | Main-plot | Sub-plot | Main-plot | Sub-plot | Estimate | Standard Error | DF | t Value | Pr > |t| | Alpha | Lower | Upper |
| main*sub | non | AC Andrew | spray | AC Andrew | -459.97 | 156.00 | 6.69 | -2.95 | 0.0226 | 0.05 | -832.39 | -87.55 |
| main*sub | non | AC Crystal | spray | AC Crystal | -1965.73 | 156.00 | 6.69 | -12.60 | <.0001 | 0.05 | -2338.15 | -1593.31 |
| main*sub | non | CDC Abound | spray | CDC Abound | -1025.30 | 156.00 | 6.69 | -6.57 | 0.0004 | 0.05 | -1397.72 | -652.88 |
| main*sub | non | CDC Imagine | spray | CDC Imagine | -281.93 | 156.00 | 6.69 | -1.81 | 0.1157 | 0.05 | -654.35 | 90.49 |
| main*sub | non | H98077001 | spray | H98077001 | -860.57 | 156.00 | 6.69 | -5.52 | 0.0010 | 0.05 | -1232.99 | -488.15 |
| main*sub | non | Harvest | spray | Harvest | -790.30 | 156.00 | 6.69 | -5.07 | 0.0017 | 0.05 | -1162.72 | -417.88 |
| main*sub | non | Lillian | spray | Lillian | -247.57 | 156.00 | 6.69 | -1.59 | 0.1585 | 0.05 | -619.99 | 124.85 |
| main*sub | non | Mahigan | spray | Mahigan | -479.27 | 156.00 | 6.69 | -3.07 | 0.0191 | 0.05 | -851.69 | -106.85 |
| main*sub | non | Seebe | spray | Seebe | -223.97 | 156.00 | 6.69 | -1.44 | 0.1962 | 0.05 | -596.39 | 148.45 |
| main*sub | non | Snowhite476 | spray | Snowhite476 | -1148.70 | 156.00 | 6.69 | -7.36 | 0.0002 | 0.05 | -1521.12 | -776.28 |
| †Pre-planned comparisons of the main-plot means (treated vs untreated) for the same sub-plot (the same cultivars) were made by invoking the LSMEANS statement with the DIFF option (Littell et al. 2002). | | | | | | | | | | | | |

| **Supplemental Table 2.2.** Differences of least squares means, t-tests and confidence limits for thousand kernel weight at Lacombe and Olds, AB, 2014†. | | | | | | | | | | | | |
| --- | --- | --- | --- | --- | --- | --- | --- | --- | --- | --- | --- | --- |
| Effect | Main-plot | Sub-plot | Main-plot | Sub-plot | Estimate | Standard  Error | DF | t Value | Pr > |t| | Alpha | Lower | Upper |
| main*sub | non | AC Andrew | spray | AC Andrew | -3.1667 | 1.9444 | 3.02 | -1.63 | 0.2013 | 0.05 | -9.3319 | 2.9986 |
| main*sub | non | AC Crystal | spray | AC Crystal | -18.2500 | 1.9444 | 3.02 | -9.39 | 0.0025 | 0.05 | -24.4153 | -12.0847 |
| main*sub | non | CDC Abound | spray | CDC Abound | -10.6667 | 1.9444 | 3.02 | -5.49 | 0.0117 | 0.05 | -16.8319 | -4.5014 |
| main*sub | non | CDC Imagine | spray | CDC Imagine | -1.4167 | 1.9444 | 3.02 | -0.73 | 0.5187 | 0.05 | -7.5819 | 4.7486 |
| main*sub | non | H98077001 | spray | H98077001 | -7.1667 | 1.9444 | 3.02 | -3.69 | 0.0342 | 0.05 | -13.3319 | -1.0014 |
| main*sub | non | Harvest | spray | Harvest | -5.9167 | 1.9444 | 3.02 | -3.04 | 0.0553 | 0.05 | -12.0819 | 0.2486 |
| main*sub | non | Lillian | spray | Lillian | -1.5833 | 1.9444 | 3.02 | -0.81 | 0.4747 | 0.05 | -7.7486 | 4.5819 |
| main*sub | non | Mahigan | spray | Mahigan | -2.5000 | 1.9444 | 3.02 | -1.29 | 0.2883 | 0.05 | -8.6653 | 3.6653 |
| main*sub | non | Seebe | spray | Seebe | -2.3333 | 1.9444 | 3.02 | -1.20 | 0.3157 | 0.05 | -8.4986 | 3.8319 |
| main*sub | non | Snowhite476 | spray | Snowhite476 | -11.5000 | 1.9444 | 3.02 | -5.91 | 0.0095 | 0.05 | -17.6653 | -5.3347 |
| †Pre-planned comparisons of the main-plot means (treated vs untreated) for the same sub-plot (the same cultivars) were made by invoking the LSMEANS statement with the DIFF option (Littell et al. 2002). | | | | | | | | | | | | |

| **Supplemental Table 2.3.** Differences of least squares means, t-tests and confidence limits fortest weight at Lacombe and Olds, AB, 2014†. | | | | | | | | | | | | |
| --- | --- | --- | --- | --- | --- | --- | --- | --- | --- | --- | --- | --- |
| Effect | Main-plot | Sub-plot | Main-plot | Sub-plot | Estimate | Standard Error | DF | t Value | Pr > |t| | Alpha | Lower | Upper |
| main*sub | non | AC Andrew | spray | AC Andrew | -0.0783 | 2.2750 | 11.3 | -0.03 | 0.9731 | 0.05 | -5.0703 | 4.9137 |
| main*sub | non | AC Crystal | spray | AC Crystal | -32.6682 | 3.1785 | 30.3 | -10.28 | <.0001 | 0.05 | -39.1571 | -26.1792 |
| main*sub | non | CDC Abound | spray | CDC Abound | -8.8467 | 2.2750 | 11.3 | -3.89 | 0.0024 | 0.05 | -13.8387 | -3.8547 |
| main*sub | non | CDC Imagine | spray | CDC Imagine | -0.2550 | 2.2750 | 11.3 | -0.11 | 0.9127 | 0.05 | -5.2470 | 4.7370 |
| main*sub | non | H98077001 | spray | H98077001 | -11.0467 | 2.2750 | 11.3 | -4.86 | 0.0005 | 0.05 | -16.0387 | -6.0547 |
| main*sub | non | Harvest | spray | Harvest | -3.2367 | 2.2750 | 11.3 | -1.42 | 0.1819 | 0.05 | -8.2287 | 1.7553 |
| main*sub | non | Lillian | spray | Lillian | -0.3217 | 2.2750 | 11.3 | -0.14 | 0.8901 | 0.05 | -5.3137 | 4.6703 |
| main*sub | non | Mahigan | spray | Mahigan | -2.6217 | 2.2750 | 11.3 | -1.15 | 0.2730 | 0.05 | -7.6137 | 2.3703 |
| main*sub | non | Seebe | spray | Seebe | -1.6883 | 2.2750 | 11.3 | -0.74 | 0.4732 | 0.05 | -6.6803 | 3.3037 |
| main*sub | non | Snowhite476 | spray | Snowhite476 | -5.8583 | 2.2750 | 11.3 | -2.58 | 0.0254 | 0.05 | -10.8503 | -0.8663 |
| †Pre-planned comparisons of the main-plot means (treated vs untreated) for the same sub-plot (the same cultivars) were made by invoking the LSMEANS statement with the DIFF option (Littell et al. 2002). | | | | | | | | | | | | |

**Supplemental** **Table 3.** Monthly precipitation (mm) at Lacombe and Olds, Alberta from 2012 to 2014 and averages for 2005-2014.

| Month | Lacombe 2012 | | Lacombe 2013 | | Lacombe 2014 | | Lacombe  2012-2014 average | | Lacombe  2005-2014  average | | Olds 2013 | | Olds 2014 | | Olds  2013-2014 average | | Olds  2005-2014 average | |
| --- | --- | --- | --- | --- | --- | --- | --- | --- | --- | --- | --- | --- | --- | --- | --- | --- | --- | --- |
| May | 58.0^ | 84.0 | | 23.5 | | 55.2 | | 46.0 | | 131.0 | | 91.0 | | 111.0 | | 68.8 | |  |
| June | 107.0 | 64.0 | | 59.7 | | 76.9 | | 74.5 | | 134.2 | | 129.4 | | 131.8 | | 110.8 | |  |
| July | 67.0 | 63.0 | | 50.7 | | 60.2 | | 97.2 | | 44.8 | | 42.6 | | 43.7 | | 64.6 | |  |
| August | 44.0 | 90.0 | | 8.5 | | 47.5 | | 65.7 | | 15.3 | | 63.5 | | 39.4 | | 74.8 | |  |
| Total | 276.0 | 301.0 | | 142.4 | | 239.8 | | 283.2 | | 325.3 | | 326.5 | | 325.9 | | 319.0 | |  |

^ Lacombe and Olds weather stations, Field Crop Development Centre, Lacombe, Alberta Agriculture and Forestry.
